1 Dental emergency: scoping review

2

3 Karla Frichembruder<sup>1</sup>, Camila Mello dos Santos<sup>1,2</sup>, Fernando Neves Hugo<sup>3</sup>

4

5 <sup>1</sup> Center of Social Dentistry Research, Federal University of Rio Grande do Sul,  
6 Porto Alegre, Rio Grande do Sul, Brazil

7 <sup>2</sup> Graduate Program in Collective Health, Federal University of Rio Grande do  
8 Sul, Porto Alegre, Rio Grande do Sul, Brazil

9 <sup>3</sup> Graduate Program in Dentistry, Federal University of Rio Grande do Sul, Porto  
10 Alegre, RS, Brazil

11

12

13

14

15 Corresponding author

16 E-mail: [karla.frichembruder@ufrgs.br](mailto:karla.frichembruder@ufrgs.br) (KF)

17

18

19

20 ¶¶These authors contributed equally to this work.

21

22

23

24

25

26

27

28

29

30

## 31 **Abstract**

32 Part of the oral health care in the care network encompasses users in  
33 cases of emergency. This study proposed to map the determinants of the use of  
34 dental care services within the health care network to address dental  
35 emergencies of the Brazilian Unified Health System (UHS) and to verify the  
36 main gaps in the research in this area. This is a scoping review that took place  
37 in 2018 using Andersen's behavioral model as a reference. A total of 16 studies,  
38 out of 3786 original articles identified, were included and reviewed. Two  
39 reviewers independently conducted the selection process and the decision was  
40 consensually taken. The mapping of the determinants revealed a greater  
41 number of enabling factors and a larger gap in results. Greater use of the  
42 emergency service was registered by people in pain, women, adults, from an  
43 urban area, with a lower income, and less education. In future studies, primary  
44 surveys are recommended, which include all ages, analyzing different groups of  
45 needs and users that take into account the country's northern region and the  
46 different subjects pointed out in this review.

47 Keywords: emergencies, oral health, health services, health care

48

49

50

51

52

53

54

55

## 56 **Introduction**

57           The majority of oral diseases is chronic and share several determinants  
58 with other chronic non-transmissible diseases. Among the different oral  
59 diseases, untreated dental caries registers the most prevalent, affecting almost  
60 half of the world population, with a negative impact on the quality of life. The  
61 pain caused by untreated dental caries affects the quality of sleep and the  
62 ability to eat, it slows growth and negatively affects social life[1,2].

63           Since 1988, Brazil's Unified Health System (UHS) is attempting to build a  
64 humanized care model, centered on the patient, and has been coordinating  
65 services and shaping actions for the promotion, prevention and care in Primary  
66 Health Care (PHC) through the Family Health Strategy, but has also been  
67 reorganizing other points of the care networks. The network conformation has  
68 the intent to address the multiple health care challenges in a fragmented system  
69 primarily oriented by acute conditions. Availability, access, and the ability to  
70 quickly transition between health care providers are the defining elements of a  
71 good or otherwise unsatisfactory network interface[3].

72           The expansion of oral health care in Brazil since the establishment of the  
73 UHS is undeniable, with the organization of priority programmatic actions, such  
74 as the expansion of primary care, specialized dental care and support services,  
75 care provided to pregnant women and children, and emergency services[4]. The  
76 guarantee of care provided to patients in acute conditions in public services is  
77 an ethical principle found in the guidelines of the National Policies of  
78 Humanization, Primary Care, Oral Health and Emergency Care (National Policy  
79 of Emergency Attention – NPEA)[5–8]. The network structure of emergency  
80 care with settled flows intends to address acute cases according to their risk

81 rating in order to provide care locally and in the appropriate time in each  
82 case[9]. It is expected that most cases of dental emergencies will be treated in  
83 the PHC or Secondary Emergency Care, being the focus of hospital care the  
84 cases with greater risk of life. After emergency care, the patient is expected to  
85 be referred for continuity of care at one of the scheduled care points. It is  
86 recommended that scheduled specialized dental care be performed exclusively  
87 by reference. During the previous decade, there was an increase in this point of  
88 care through the induction of implantation of dental specialty centers (DSC).

89         The monitoring of the development of the care network encompasses  
90 several elements, such as the operationalization of the governance system,  
91 population characteristics, operational structure and model of care. In turn, the  
92 monitoring of the use of network services requires the extension of the scope of  
93 analysis, since the use is shaped by the *“interaction of behaviors of individuals  
94 and professionals that lead them through the health system”*[10]. The mapping  
95 of determinants of the use of dental emergency services as part of the UHS is  
96 decisive for the analysis of the situation, for the planning of actions of  
97 intervention aimed at improving access and quality of care, and represents a  
98 research gap.

99         In order to understand the different factors which may influence the use  
100 of network health services by users in dental emergency, this study aims to map  
101 the determinants of use of the emergency care network (ECN) of the UHS and  
102 verify the main research gaps. The scoping review in the Brazilian context is  
103 justified by the influence of the organizational model on the use of services.

## 104 **Material and methods**

105           Scoping reviews are a sort of knowledge synthesis which systematically  
106 maps evidence on a specific subject matter, identifying key concepts, theories,  
107 sources of evidence, and research[11]. This scoping review follows the five  
108 steps proposed by Ashley and O'Malley[12]: (1) identifying the research  
109 question, (2) identifying relevant studies, (3) selecting studies, (4) collecting  
110 data, (5) mapping, summarizing and describing the results[12].

## 111 **Theoretical model**

112           Understand how the use of services in the network occurs and how the  
113 factors of the behavioral model modulate the access to health services.. It  
114 means obtaining proper care at the right time and place to promote better health  
115 outcomes. This model is intricate and multidimensional and has been improved  
116 over the years. The model bases itself on the fact that improved access to care  
117 is more properly addressed and explained through the relationship between  
118 predisposing, enabling, need, health behaviors and outcomes and considering  
119 contextual and individual factors[13].

## 120 **Research question**

121           The topic of interest was dental emergencies and the research question  
122 was the following: what has been studied on the use of dental emergency care  
123 network in Brazil's UHS public services? The question encompasses the  
124 concept of emergency in dentistry, user-related factors, as well as the  
125 organization of the ECN, its components and organizational principles. The

126 preestablished criterion of inclusion was to be an article on the subject of dental  
127 emergency care in the context of Brazilian public services.

## 128 **Research and study selection**

129 In order to build the research strategies, an adapted version of the PECO  
130 strategy was adopted (P: patient, E: exposure, C: comparison, O: outcomes),  
131 turning into PEC, in which “P” means the population (users), “E” means  
132 exposure of interest (dental emergency), “C” means the context (health  
133 services)[14].

134 The health descriptors and the combinations used to build the strategies  
135 were the following: “emergencies”, “emergency”, “oral health”, “dentistry” and  
136 “health services” with Boolean operators such as “AND” and “OR”. The search  
137 was carried out in the Medline (PubMed), Embase and Web of Science  
138 databases from their beginning until September 2018. The descriptors  
139 summarized in Medline were: (((((((((((((emergencies OR emergenc\*) OR  
140 urgenc\*)) OR ((out of hours) OR out-of-hours))) AND (("oral health" OR dent\*))  
141 AND (((((((((((health services OR public health dentistry]) OR after-hours care OR  
142 "dental care") OR emergenc\* dental service) OR emergenc\* dental care) OR  
143 "oral care") OR "dental services"))))))))))); in Embase: ('out-of-hours' OR 'out of  
144 hours' OR 'emergen\*' OR 'urgen\*') AND ('oral health' OR 'dental') AND  
145 ('emergency health service' OR 'out-of-hours care' OR 'emergency care' OR  
146 'emergency care'); and in Web of Science: (((emergencies/ OR “urgen\*dental”  
147 OR “emergen\* dental”) OR (“out-of-hours” OR “out of hours” OR  
148 “unscheduled”)) AND (dental care/ OR dental health services/ OR “dental care”  
149 OR “dental service\*” OR “public health dentistry” OR “dental after-hours care ”)).

150 Also, the search was conducted in the gray literature using the “Google Scholar”  
151 search engine.

152 Titles and abstracts were read and analyzed in order to identify those  
153 potentially eligible for the study. The selected studies were fully read by two  
154 independent reviewers to confirm the relevance when taking into consideration  
155 the review question and, when relevant, to extract the data deemed interesting.

156 After the completion of the search and analysis processes, the following  
157 exclusion criteria were established: published before 1990, having as a  
158 referencing point the fact that such was the year of enactment of Law 8080,  
159 which rules on the organization of health services, abstracts and articles  
160 published as part of meetings and studies in hospitals.

## 161 **Data collection, summarization and presentation of results**

162 The data extracted were: author, year of publication, journal, emergency  
163 concept, objectives, methodology (setting, design, population/sample, duration,  
164 outcome and exploratory variables) and results. The data was organized into  
165 Excel spreadsheets. The studies were classified according to the Emergency  
166 Care Network in: PHC, DEC and ECN. The term DEC was used to take into  
167 consideration different terminologies found for specialized dental emergency  
168 services, in turn the term ECN was used to identify studies involving both points  
169 of the emergency network. DEC are intermediary services that exclusively  
170 attend emergencies, supporting this service in the PHC and reducing the  
171 hospitalization of dental urgency in the hospital, which should refer care to the  
172 PHC, DSC, or hospitals according to the needs of the people. It includes dental  
173 care in emergency medical services that can be qualified for 24-hour care,  
174 offering beds for short-term prehospital care, in this case, receiving its own

175 financing according to the fulfillment of pre-established goals. The studies were  
176 grouped according to the age variable of the participants, studies with  
177 participants aged 20 years or more were grouped in adults and old adults. The  
178 results were categorized according to the components of behavioral model ,  
179 similar to the methodology used by Worsley et al., that evaluated access to  
180 dental emergency services[15]. Among enabling factors were the specific  
181 aspects of the Brazilian model, which are related to organization and financing  
182 that have an influence on the universal and comprehensive access to care in  
183 the network. From this standpoint, the variables of the studies that attempted to  
184 assess the perception and agreement of the professionals and  
185 managers/coordinators about the service were distributed considering the  
186 professionals and managers, and kept as capacitors, since they were  
187 understood as the evidence of the service organization, in the meantime, as  
188 observed by Worsley, there was the possibility to include them in other fields of  
189 the model. Therefore, 5, 8 and 20 variables were grouped as interface between  
190 PHC and DEC (health care network design, levels of health care,  
191 comprehensiveness, integration-interdependence-communication, streams of  
192 care), perspective of professionals (type of oral conditions attended ,  
193 treatments, reference to hospitals, knowledge required for action, service  
194 orders, completion of treatment, more frequent type of urgency, reception and  
195 risk classification, work overload, clinical and pharmacological guidelines,  
196 referral system, continuing education, resources, patient profile, patient  
197 admission form, continuity of care, medical records, gratuities, time and  
198 attendance monitoring and managerial meetings), perspective of managers  
199 (waiting time, structural conditions, patients' admission form, professional



200 satisfaction, social control, production goals, patient satisfaction, reference  
201 system), respectively. In health behavior, the use of dental floss and tooth  
202 brushing were grouped into oral hygiene. In use of personal health services, 14  
203 variables were arranged together as use due to dental emergency (difficulty in  
204 accessing dental care, emergency care as first choice to access PHC, annual  
205 trend of care at DEC, emergency service as first access to dental care, PHC or  
206 DEC as first choice to dental emergency care, return to the dental emergency  
207 service for the same problem, comparison of type of dental emergency care in  
208 different services, time since last dental appointment, unresolved complaints  
209 and abandonment).

## 210 **Ethical Considerations**

211 This study relied on secondary data analysis, available in database of  
212 scientific literature and, therefore, it did not require submission to the Research  
213 Ethics Committee.

## 214 **Results**

215  
216 The study encompassed a total of 3786 articles after the removal of  
217 duplicates and, of these, 16 studies were included. The flowchart for the  
218 selection of publications is presented in figure1.

219 Fig 1. Scoping review flowchart

220 The time needed to carry out the study, from the research project to the  
221 completion of the article, was of approximately five months.

## 222 **Studies description**

223           Of the 16 studies included, four (25%) were part of the PHC, ten (62.5%)  
224 of the DEC, and two (12.5%) involved the ECN. No publications were found  
225 from the country's Northern region, publications on DEC are distributed among  
226 services located in the other 4 regions of the country, articles related to PHC  
227 come solely from services located in the South and Southeast regions, while  
228 publications involving the ECN come from South and Northeast regions.

229           Among the primary studies, fifteen were quantitative (93.8%), among  
230 them 8 (53.4%) were descriptive and 7 (46.7%) cross-sectional, the data were  
231 secondary in 9 (60%), the remaining used questionnaires. Of the 15 quantitative  
232 studies, 10 (62.5%) had the individual as the unit of analysis.

## 233 **Emergency concept**

234           Four articles (25%) presented three concepts on emergency, "Urgency  
235 is any immediate treatment that alleviates the patient's discomfort who is not at  
236 risk, while emergencies are serious occurrences, in which the patient requires  
237 quick care, since there is a risk of life involved"[16], "a dental emergency is  
238 associated with immediate measures whose target is to alleviate the painful,  
239 infectious and/or aesthetic symptoms of the oral cavity"[17,18].and "the dental  
240 emergency service can be defined as the care provided to patients with oral  
241 issues that interfere with their lives or organ functioning"[19].

## 242 **Behavioral model for the use of health services**

243           The mapping of determining factors on the use of services, according to  
244 the included studies, is shown in figure 2.

245           Fig 2. Determinant factors in use of dental emergency services

246           Among the 146 occurrences of determining factors, the enabling factors  
247 were the most frequent (34.2%) and the outcome category was the least  
248 studied (2%). The research gaps are shown in figure 3.

249           Fig 3. Gaps in dental emergency research

## 250   **Predisposing factors and gaps**

251           Among the predisposing factors, gender and age were the variables that  
252 appeared most frequently in the studies. The female gender was the most  
253 frequent (6/10, 60%)[16–25]. The studies that included all ages or those above  
254 13 years old (n=7/9, 63%) pointed adults as the most prevalent, in turn, in  
255 studies up to 19 years (n=3), the highest frequency was found between 10 and  
256 14 years[16–25]. The comparative study indicated a higher prevalence of DEC  
257 use by teenagers in comparison to children[21]. The proportionality between  
258 gender and age and the population without emergent needs, or the ascribed or  
259 reference population, was not addressed.

260           A low number of studies used the variables origin, ethnicity and health  
261 predispositions. An inverse relationship between education and emergency use  
262 was seen in both points of the network (3/4, 75%)[17,20,24], one study refers to  
263 this inversion through maternal education[20]. In PHC and DEC, there was  
264 greater use by married individuals, the majority of which employed or  
265 autonomous (n=2)<sup>20,23</sup>. In PHC, an average of two children was found, as well  
266 as double or triple shift jobs (n=1)[20]. In DEC, the majority of those attended  
267 originated from the service's coverage area (n=1), there is a higher chance of  
268 use by people from neighborhoods deemed as having greater social exclusion  
269 rate (n=1)[24] and rural residents accessed it less often (n=2)[16,25]. In the  
270 contextual analysis of the PHC, the group of services with the greatest ratio of

271 dental emergency was not the one whose area was the most vulnerable to  
272 health (n=1)[26]. The health predispositions described the fear of going to the  
273 dentist (n=1)[20], depression (n=1)[20], allergies (n=2)<sup>19,28</sup> and systemic health  
274 conditions, with hypertension being the most frequent (n=1)[17]. There were  
275 several research gaps addressing beliefs, knowledgeability about the service,  
276 trauma-related issues and studies conducted in specific groups such as  
277 disabled and older adults.

## 278 **Enabling factors and gaps**

279         There was a declining ratio between the income of users and the use of  
280 emergency services at both points of the network (n=2)[20,24]. A study  
281 conducted in the DEC reported that most users do not have health insurance  
282 and travel by bus to the emergency[24]. When analyzing the expansion of the  
283 oral health team (OHT) in the PHC network over a three-year period, one study  
284 noticed that, in relation to the total number of appointments, there was a  
285 statistically significant reduction during the studied period that was justified by  
286 the year of greatest expansion. Nevertheless, the monthly variation was high  
287 and, although there was a reduction in the total number of emergency visits, in  
288 the vast majority of the months studied, the target of less than 20% of the total  
289 number of appointments was not reached[27]. In the ecological study, the  
290 differences between the group of services with the highest ratio of emergency  
291 and preventive procedures could not be explained by the population coverage  
292 provided by the family health team and the ESB[26].

293         Information on health policy, funding and organization of the ECN and  
294 the DEC is limited to a scarce number of studies with high variability in the  
295 variables gathered, but their results converge to deficiencies in the organization

296 of the ECN. One study points out that most managers are unaware of policy  
297 updates, others barely engage in financial planning and execution[28,29]. It was  
298 reported that most managers are unaware of objectives, they acknowledge  
299 access to the DEC by free demand, there is no waiting time science, nor one  
300 regarding the level of user satisfaction, but that there is a record of criticism and  
301 suggestions provided by the user and they say they take into account the  
302 professional satisfaction and user suggestions, while most do not engage in the  
303 Municipal Health Council (n=1)[28]. The managers guaranteed the presence of  
304 at least one equipment ready to be used, having been subjected to preventive  
305 maintenance (n=1)[28]. There is evidence of acknowledgment of the role of  
306 each of the points among network professionals (n=1)[29], but without any  
307 communication, protocols and reference flows (n=2)[28,30], with poor  
308 recognition of lines streams of care in the DEC (n=1). Studies conducted in the  
309 DEC reported diverging opinions among professionals about some activities to  
310 be performed, procedures and which to refer[30,31], while there is consensus  
311 on spontaneous demand access and on the use of the medical record, science  
312 dedicated to accommodation failures and the system of risk rating, referencing,  
313 continuing education and protocol with clinical and pharmacological guidelines,  
314 and failures in infrastructure resources. Also, professionals confirm the control  
315 of workload and additional workload for the night shift[30,31]. The profile of the  
316 emergency user outlined by the professional confirms the predisposing  
317 characteristics and needs obtained in this review, the majority affirms that the  
318 user does not have a referral document, but affirms that they guide their own  
319 search under the continuity of care[28]. Most professionals acknowledge the  
320 highest contributions to their practice in graduation and in-service experience

321 (n=1)[30]. There are indications for research on the effect of the NPEA on the  
322 ECN development, changes in access after organizational changes in the care  
323 network, related to health economics and related to the user.

### 324 **Health needs factors and gaps**

325 The need perceived by the majority of users that led them to use the  
326 services was pain (n=7)[16–18,20,22,24,25]. One study showed that post-  
327 traumatic injury complaints were more frequent in men and there was a  
328 noteworthy difference by age group, in which the highest prevalence of trauma  
329 and post-traumatic injuries was 0 to 5 years[22]. A share of DEC users  
330 acknowledges that they do not have an emergency need (n=1)[24]. The  
331 comparative study mentioned emergency as the reason for the first access to  
332 oral health for a portion of the population up to 17 years old, in which  
333 adolescents are more prone to entry via DEC[21]. The gaps identified are  
334 related to the use of subjective and social indicators, the agreement between  
335 professionals and managers and analysis of environmental contexts.

### 336 **Health behavior factors and gaps**

337 The health practices described were oral hygiene (n=1)[17], self-  
338 medication ((n=2)[16,25], smoking (n=2)[17,20] and alcoholism (n=1)[17]. The  
339 majority of medical records did not contain information on self-medication,  
340 among which they reported low use, with analgesics being the most frequent. A  
341 study in the PHC described that most users did not experience difficulties in  
342 accessing and had already used the service for emergency-related matters, and  
343 the time between the perception of the need and the use of the service was  
344 seven days[20]. In the DEC, one study reported that the ratio of people

345 attended in the estimated population did not differ over a three-year period[24],  
346 another study affirmed that just under a third of those attended declared they  
347 failed to access the PHC due to infrastructure issues, the lack of openings or  
348 the absence of the medical specialty required[23], for the majority the time from  
349 the onset of symptoms to the use of care services was two days[24]. A small  
350 ratio is found in dental care, most of them use the UBS or health insurance[18].  
351 The results regarding greater demand for the service depending on the shift,  
352 day and month were divergent (n=4)[16,22,23,25], but there seems to be a  
353 relationship between the shifts used and the age group, where older people  
354 tend to use them in the morning, children in the afternoon and teenagers and  
355 young adults at night. The share of people who use the DEC and were not  
356 attended was similar in the three studies, with less than 3%[16,22,25]. The  
357 comparative study found that the prevalence of first access to the system  
358 through the emergency via DEC was significantly higher in adolescents than in  
359 children, the majority of participants has spent more than one year without any  
360 dental appointment and a minority has used the service previously as a matter  
361 of emergency[21]. In relation to treatment, restoration and extraction are the  
362 most frequent procedures (n=3)[18,19,23]. From the contextual standpoint, in  
363 the PHC, the probability of being part of the group of services with the highest  
364 emergency ratio was associated with having the treatment completed for more  
365 than 3 teeth with cavities or indication of tooth extraction[22]. Regarding the  
366 problem-solving abilities in the DEC, one article pointed out that most of the  
367 complaints were solved and another reported that the majority of the  
368 treatments were not fully operative[16,18]. A study conducted in the DEC  
369 pointed out that the majority of those attended do not need to be referenced for

370 programed care in specialized services[16]. No publications were found on the  
371 use and adherence to treatment or referral protocols, nor about needs related to  
372 continuing education or discussion of care from the ethical standpoint.

### 373 **Outcome factors and gaps**

374 As for the outcome component, a publication presented the perception of  
375 the users regarding the DEC service. Facilities, information, cleaning and  
376 signage, waiting time and care provided by the ESB were assessed as good,  
377 with room for improvement, particularly in waiting time and care provided[24].  
378 No studies were found that assessed the perception of post-care health and  
379 quality of life.

### 380 **Discussion**

381

382 The mapping of the determining factors of the use of emergency services  
383 provided an overview of the evidence, the reflection on variables to be included  
384 in future studies and a wide array of research topics which may lead to a better  
385 understanding of the determinants of use of emergency dental services. There  
386 is a short number of studies involving the ECN and the PHC, and there are  
387 research gaps in the Northern region of Brazil. There were a considerable  
388 number of descriptive studies, variability between the categories studied and  
389 diversity of exploratory variables that make comparisons more difficult, but they  
390 nonetheless extend the perspective on the subject matter.

391 The concepts found are related to the perceived need and to the  
392 organization of care, since they refer to care or service, they include the notion  
393 of time and relief of symptoms, illness and issues that interfere with the life of  
394 the user. The concept of life-threatening is the differentiator and promptly



395 indicates the need for immediate care in tertiary care. Nevertheless, there is a  
396 scarce number of publications that conduct conceptual reflections on dental  
397 emergency. The presence of some level of disagreement regarding the  
398 activities, procedures and reference found in the DEC does not seem to reflect  
399 the conceptual range of emergency care and suggests the presence of tensions  
400 in the team that may constitute barriers to access and indicate the need for  
401 improvement in the work[32].

402         The absence of some elements emphasized in the model can be partially  
403 explained by the restriction of data information from the Brazilian information  
404 system. Notwithstanding, the results found are in line with those of a systematic  
405 review of inequity in access in oral health services which, in South America, has  
406 revealed that the opportunities of access are lower for men, ethnic minorities,  
407 rural inhabitants and distinguishes itself for the access by a lower educational  
408 level and income, since, in the emergency service, the individuals with lower  
409 educational level, lower income and diminished access to health plans were the  
410 ones that accessed it the most[33].

411         The international literature provides several that separate studies on  
412 traumatic from non-traumatic dental emergencies[34–37], but not a single  
413 Brazilian studied used this division, probably because of the differences  
414 between the organization of health services, since a large share of these  
415 articles refer to care in outpatient clinics and some involve care provided by a  
416 medical professional. Nonetheless, there was an analysis of traumatic events  
417 that corroborated the greater frequency of trauma in men and younger boys[38].  
418 The prevention of trauma is difficult, the approach varies, since the cause is  
419 related to risk factors according to age, accidents, sports and violence[38]. For

420 instance, studies involving day-care centers and public schools show the low  
421 level of knowledge on dental trauma cases, evidencing a research gap in  
422 relation to the PHC[39,40]. There were no studies on anxiety in the ECN, two  
423 studies in Dental School services reveal that an important portion of those seen  
424 in their emergency services has a high degree of anxiety, which is higher in  
425 women and is related to previous traumatic events[41,42].

426         The limitations of this scoping review are the exclusion of abstracts from  
427 events and theses, dissertations and monographs, which may have caused the  
428 omission of some relevant study. The high variability among the studied age  
429 groups in the DEC can be a confounding factor.

430         Studies on the care network and the integration of the PHC with the  
431 Dental Specialties Centers (DSC) presented some results similar to those in the  
432 PHC and DEC, such as failures in continuing education and reduced  
433 engagement in participation forums and, although there are also weaknesses  
434 identified in services and in the interface, they seem to register better results  
435 when it comes to the identification of objectives, presence of protocols and  
436 reference flows[43,44]. The policies that involve secondary care in the care  
437 network, the DSC and the DEC are recent, but they have occupied different  
438 positions, since, even though both are based on the National Oral Health Policy,  
439 the regulations of the DEC services are associated with the NPEA, whose  
440 priority is not dental care[7,45,46]. The difference between having specific  
441 financial incentive rules, implementation, monitoring and assessment, as well as  
442 the involvement different sectors in the planning, training and monitoring of the  
443 DSC, may serve as an explanation for the better results in comparison to when  
444 these are related to a broader policy.

## 445 **Conclusion**

446

447           To improve access and the quality of oral health care in Brazil, it is  
448 important to identify the determinants of the use of emergency dental services.  
449 The results converge to accumulated needs related to the aggravation of  
450 chronic oral diseases with painful symptomatology in users who are subjected  
451 to worse socioeconomic conditions and they appear to differ from the  
452 determinants of use by programmed demand. There is an evident need for  
453 improvement in each of point of the ECN and in its interface, such as  
454 improvements in accommodation, assimilation of risk rating, definitions of  
455 protocols and reference flows, which require the involvement of professionals  
456 and managers in every network sector. This review also contributes to the  
457 reflection on variables, subject matters and research designs that must be taken  
458 into account in the planning of new studies, since there is a need for further  
459 research efforts on the performance of services and the care network and  
460 effectiveness of this sort of care in dental emergencies.

## 462 **References**

463

- 464 1. Marcenes W, Kassebaum NJ, Bernabé E, Flaxman A, Naghavi M, Lopez  
465 A, et al. Global Burden of Oral Conditions in 1990-2010. *J Dent Res*.  
466 2013;92: 592–597. doi:10.1177/0022034513490168
- 467 2. Sheiham A, Williams DM, Weyant RJ, Glick M, Naidoo S, Eiselé JL, et al.  
468 Billions with oral disease A global health crisis - A call to action. *J Am*  
469 *Dent Assoc. American Dental Association*; 2015;146: 861–864.  
470 doi:10.1016/j.adaj.2015.09.019
- 471 3. Morris AJ, Burke FJT. Primary and secondary dental care: how ideal is  
472 the interface? *Br Dent J*. 2001;191: 666–670. doi:10.1038/sj.bdj.4801263
- 473 4. Antunes JLF, Narvai PC. Dental health policies in Brazil and their impact  
474 on health inequalities. 2010;44: 360–365.
- 475 5. Brasil.Ministério da Saúde. Secretaria de Atenção à Saúde. Política  
476 Nacional de Humanização: o que é, como implantar. 2010.
- 477 6. Brasil. Ministério da Saúde. Secretaria de Atenção à Saúde.  
478 Departamento de Atenção Básica. Política Nacional de Atenção Básica.  
479 Brasília; 2012.
- 480 7. Brasil. Ministério da Saúde. Secretaria de Atenção à Saúde.  
481 Departamento de Atenção Básica. Diretrizes da Política Nacional de  
482 Saúde Bucal. 2004.
- 483 8. Brasil.Ministério da Saúde. Secretaria de Atenção à Saúde.  
484 Coordenação-Geral de Urgência e Emergência. Política Nacional de  
485 Atenção às Urgências. 3rd ed. Brasília: Ministério da Saúde; 2006.
- 486 9. Mendes EV. *As Redes de Atenção à Saúde*. 2nd ed. Brasília; 2011.
- 487 10. Travassos C, Martins M. A review of concepts in health services access  
488 and utilization. *Cad Saude Publica*. 2004;20: S190–S198.  
489 doi:10.1590/S0102-311X2004000800014
- 490 11. Tricco AC, Lillie E, Zarin W, O'Brien KK, Colquhoun H, Levac D, et al.  
491 PRISMA Extension for Scoping Reviews (PRISMA-ScR): Checklist and  
492 Explanation. *Ann Intern Med*. 2018;169: 467. doi:10.7326/M18-0850
- 493 12. Arksey H, O'Malley L. Scoping studies: towards a methodological  
494 framework. *Int J Soc Res Methodol*. 2005;8: 19–32.

- 495 doi:10.1080/1364557032000119616
- 496 13. Andersen RM, Davidson PL, Baumeister SE. Improving Access to Care.  
497 In: Gerald F. Kominski, editor. Changing the US Health Care System: Key  
498 Issues in Health Services Policy and Management. 4th ed. 2013. pp. 33–  
499 69.
- 500 14. Menezes SSC de, Corrêa CG, Silva R de CGE, Cruz D de AML da.  
501 Clinical reasoning in undergraduate nursing education: a scoping review.  
502 Rev da Esc Enferm da USP. 2015;49: 1032–1039. doi:10.1590/S0080-  
503 623420150000600021
- 504 15. Worsley D, Robinson PG, Marshman Z. Access to urgent dental care: A  
505 scoping review. Community Dental Health. 2017.  
506 doi:10.1922/CDH\_4038Worsley08
- 507 16. Prado M da CM da C, Casotti CACA, Francisco KSMKSM, Sales AS.  
508 Profile of users and damages in children and adolescents met on a ready  
509 dental care. Rev Saude Com. 2014;10: 368–375.
- 510 17. Pinto EC, Barros VJ de A, Coelho M de Q, Costa S de M. Emergency  
511 dental services in a Health Unit linked to the Family Healthcare Strategy  
512 of Montes Claros , Minas Gerais. Arq Odontol,. 48: 166–174.
- 513 18. Flumignan JDP, Neto LF de S. Dental care in emergency units:  
514 characterization of demand. Rev Bras Odontol. 2014;71: 124–129.
- 515 19. Maciel RM, Filho H de AA, Oliveira M da CA de, Maciel C, Redivivo R,  
516 Franca C da, et al. The emergency dental care in the public Health  
517 service in Olinda. Odontol Clínico-Científica. 2016;1: 39–42.
- 518 20. Cassal JB, Cardoso DD, Bavaresco CS. Profile of users of urgent dental  
519 care in a primary health care unit. Rev APS. 2011;14: 85–92.
- 520 21. Pereira F, Assunção L, Ferreira F, Fraiz F. Emergency Dental Care of  
521 Children and Adolescents in Basic Health Unit and Emergency Care Unit.  
522 Pesqui Bras Odontopediatria Clin Integr. 2017;17: 1–9.  
523 doi:10.4034/PBOCI.2017.171.13
- 524 22. Figueiredo N, Carnut L, Goes PSA de. Evaluation of out-of-hours dental  
525 service, Recife, Brasil. Int J Dent. 2010;9: 114–119.
- 526 23. Fonseca DAV da, Mialhe FL, Ambrosano GMB, Pereira AC, Meneghim M  
527 de C. Influence of the organization of primary care and the socio-  
528 demographic characteristics of the population on the demand for

- 529 municipal emergency dental care. *Cien Saude Colet.* 2014;19: 269–278.  
530 doi:10.1590/1413-81232014191.2048
- 531 24. Matsumoto MSA, Gatti MAN, De Conti MHS, Simeão SFDAP, Braga  
532 Franzolin SDO, Marta SN. Determinants of demand in the public dental  
533 emergency service. Patil S, editor. *J Contemp Dent Pract. India*; 2017;18:  
534 156–161. doi:10.5005/jp-journals-10024-2008
- 535 25. Prado M da C, Weberling LB, Sales AS, Nery AA, Casotti CA. Profile of  
536 disorders and users aged adults and served in ready dental care. *Odontol*  
537 *Clínico-Científica.* 2016;16: 33–38.
- 538 26. Esteves RSS, Mambrini JVM, Oliveira ACB, Abreu MHNG. Performance  
539 of Primary Dental Care Services: An Ecological Study in a Large Brazilian  
540 City. *Sci World J.* 2013;2013: 1–6. doi:10.1155/2013/176589
- 541 27. Palacio D da C, Vazquez F de L, Ramos DVR, Peres SV, Pereira AC,  
542 Guerra LM, et al. Evolution of post-deployment indicators of oral health on  
543 the Family Health Strategy. *Einstein (São Paulo).* 2014;12: 274–281.  
544 doi:10.1590/s1679-45082014ao3000
- 545 28. Austregésilo SC, Leal MCC, Góes PS de A, Figueiredo N. An Evaluation  
546 of the Urgent Dental Services Units (UDS): The View of Health Managers,  
547 Supervisors and Professionals. *Pesqui Bras Odontopediatria Clin Integr.*  
548 2013;13: 161–169. doi:10.4034/PBOCI.2013.132.04
- 549 29. Austregesilo SC, Leal MCC, Figueiredo N, de Goes PSA. The Interface  
550 between Primary Care and Emergency Dental Services (SOU) in the  
551 SUS: the interface between levels of care in oral health. *Cien Saude*  
552 *Colet. Brazil*; 2015;20: 3111–3120. doi:10.1590/1413-  
553 812320152010.12712014
- 554 30. Rios L, Queiroz M. Perception of Dentists about the Functioning of  
555 Emergency Public Dental Services. *Pesqui Bras Odontopediatria Clin*  
556 *Integr.* 2017;17. doi:10.4034/PBOCI.2017.171.04
- 557 31. Rios LE, Queiroz MG. Dental emergencies in public health services: what  
558 is the role of the Dental Surgeon? *Rev Odonto Ciência.* 2017;32: 41.  
559 doi:10.15448/1980-6523.2017.1.26441
- 560 32. Santos AM dos, Assis MMA, Rodrigues AÁA de O, Nascimento MAA do,  
561 Jorge MSB. Conflicting situations in the reception of oral health teams  
562 from the Family Health Program in Alagoinhas, Bahia, Brazil. *Cad Saude*

- 563 Publica. Brazil; 2007;23: 75–85. doi:10.1590/S0102-311X2007000100009
- 564 33. Reda SF, Reda SM, Thomson WM, Schwendicke F. Inequality in  
565 Utilization of Dental Services: A Systematic Review and Meta-analysis.  
566 Am J Public Health. 2018;108: e1–e7. doi:10.2105/AJPH.2017.304180
- 567 34. Da Silva K, Kunzel C, Yoon RK. Utilization of emergency services for non-  
568 traumatic dental disease. J Clin Pediatr Dent. United States; 2013;38:  
569 107–12. Available: <http://www.ncbi.nlm.nih.gov/pubmed/24683771>
- 570 35. Nakao S, Scott JM, Masterson EE, Chi DL. Non-traumatic Dental  
571 Condition-Related Emergency Department Visits and Associated Costs  
572 for Children and Adults with Autism Spectrum Disorders. J Autism Dev  
573 Disord. United States; 2015;45: 1396–1407. doi:10.1007/s10803-014-  
574 2298-0
- 575 36. Okunseri C, Okunseri E, Thorpe JM, Xiang Q, Szabo A. Patient  
576 characteristics and trends in nontraumatic dental condition visits to  
577 emergency departments in the United States. Clin Cosmet Investig Dent.  
578 New Zealand; 2012;4: 1–7. doi:10.2147/CCIDEN.S28168
- 579 37. Alnaggar D, Andersson L. Emergency management of traumatic dental  
580 injuries in 42 countries. Dent Traumatol. Denmark; 2015;31: 89–96.  
581 doi:10.1111/edt.12155
- 582 38. Andersson L. Epidemiology of traumatic dental injuries. Pediatr Dent.  
583 United States; 2013;35: 102–105.
- 584 39. Campos MI da C, Henriques KAM, Campos CN. Level of information  
585 about urgent procedures in dental traumatism with avulsion. Pesqui Bras  
586 Odontopediatria Clin Integr. 2006;6: 155–159.
- 587 40. Costa LED, Queiroz F de S, Nóbrega CBC, Leite MS, Nóbrega WFS,  
588 Almeida ER de. Dental trauma in childhood: evaluation action of  
589 educators in public nurseries from the city of Patos/PB. Rev Odontol da  
590 UNESP. 2014;43: 402–408. doi:10.1590/1807-2577.1053
- 591 41. Kanegane K, Penha SS, Borsatti MA, Rocha RG. Dental anxiety in an  
592 emergency dental service. Rev Saude Publica. S.S. Penha, Depto. de  
593 Estomatologica, Faculdade de Odontologia, Av. Prof. Lineu Prestes,  
594 05508-900 São Paulo, SP, Brazil; 2003;37: 786–792. Available:  
595 [http://www.embase.com/search/results?subaction=viewrecord&from=exp](http://www.embase.com/search/results?subaction=viewrecord&from=export&id=L38088165)  
596 [ort&id=L38088165](http://www.embase.com/search/results?subaction=viewrecord&from=export&id=L38088165)

- 597 42. Kanegane K, Penha SS, Munhoz CD, Rocha RG. Dental anxiety and  
598 salivary cortisol levels before urgent dental care. *J Oral Sci. Japan*;  
599 2009;51: 515–520.
- 600 43. Frichembruder K, Hugo FN, Hilgert JB. Profile and perception of  
601 professionals of Dental Specialty Centers in the state of Rio Grande do  
602 Sul, Brazil. *Rev da Fac Odontol - UPF*. 2017;22: 43–48.  
603 doi:10.5335/rfo.v22i1.7109
- 604 44. Machado FC de A, Silva JV, Ferreira MÂF. Factors related to the  
605 performance of Specialized Dental Care Centers. *Cien Saude Colet*.  
606 2015;20: 1149–1163. doi:10.1590/1413-81232015204.00532014
- 607 45. Brasil. Portaria 599/GM de 23 de março de 2006. Define a implantação  
608 de Especialidades Odontológicas (CEOs) e de Laboratórios Regionais de  
609 Próteses Dentárias (LRPD), e estabelece critérios, normas e requisitos  
610 para seu financiamento. Brasil: Diário Oficial da União. 24 Mar; 2006.
- 611 46. Brasil. Ministério da Saúde. Portaria Nº 2.436, de 21 de Setembro de  
612 2017. Aprova a Política Nacional de Atenção Básica, estabelecendo a  
613 revisão de diretrizes para a organização da Atenção Básica, no âmbito do  
614 Sistema Único de Saúde (SUS). [Internet]. Diário Oficial da  
615 União, edição 183, seção 1, p 68, 22 set; 2017. Available:  
616 [http://www.imprensanacional.gov.br/materia/-](http://www.imprensanacional.gov.br/materia/-/asset_publisher/Kujrw0TZC2Mb/content/id/19308123/do1-2017-09-22-portaria-n-2-436-de-21-de-setembro-de-2017-19308031)  
617 [/asset\\_publisher/Kujrw0TZC2Mb/content/id/19308123/do1-2017-09-22-](http://www.imprensanacional.gov.br/materia/-/asset_publisher/Kujrw0TZC2Mb/content/id/19308123/do1-2017-09-22-portaria-n-2-436-de-21-de-setembro-de-2017-19308031)  
618 [portaria-n-2-436-de-21-de-setembro-de-2017-19308031](http://www.imprensanacional.gov.br/materia/-/asset_publisher/Kujrw0TZC2Mb/content/id/19308123/do1-2017-09-22-portaria-n-2-436-de-21-de-setembro-de-2017-19308031)

619

## 620 **Supporting Information**

- 621 S1. Fig 1. Scoping review flowchart
- 622 S2. Fig 2. Determinant factors in use of dental emergency services
- 623 S3. Fig 3. Gaps in dental emergency research
- 624 S4. Fig 4. Prisma Checklist Scoping Review



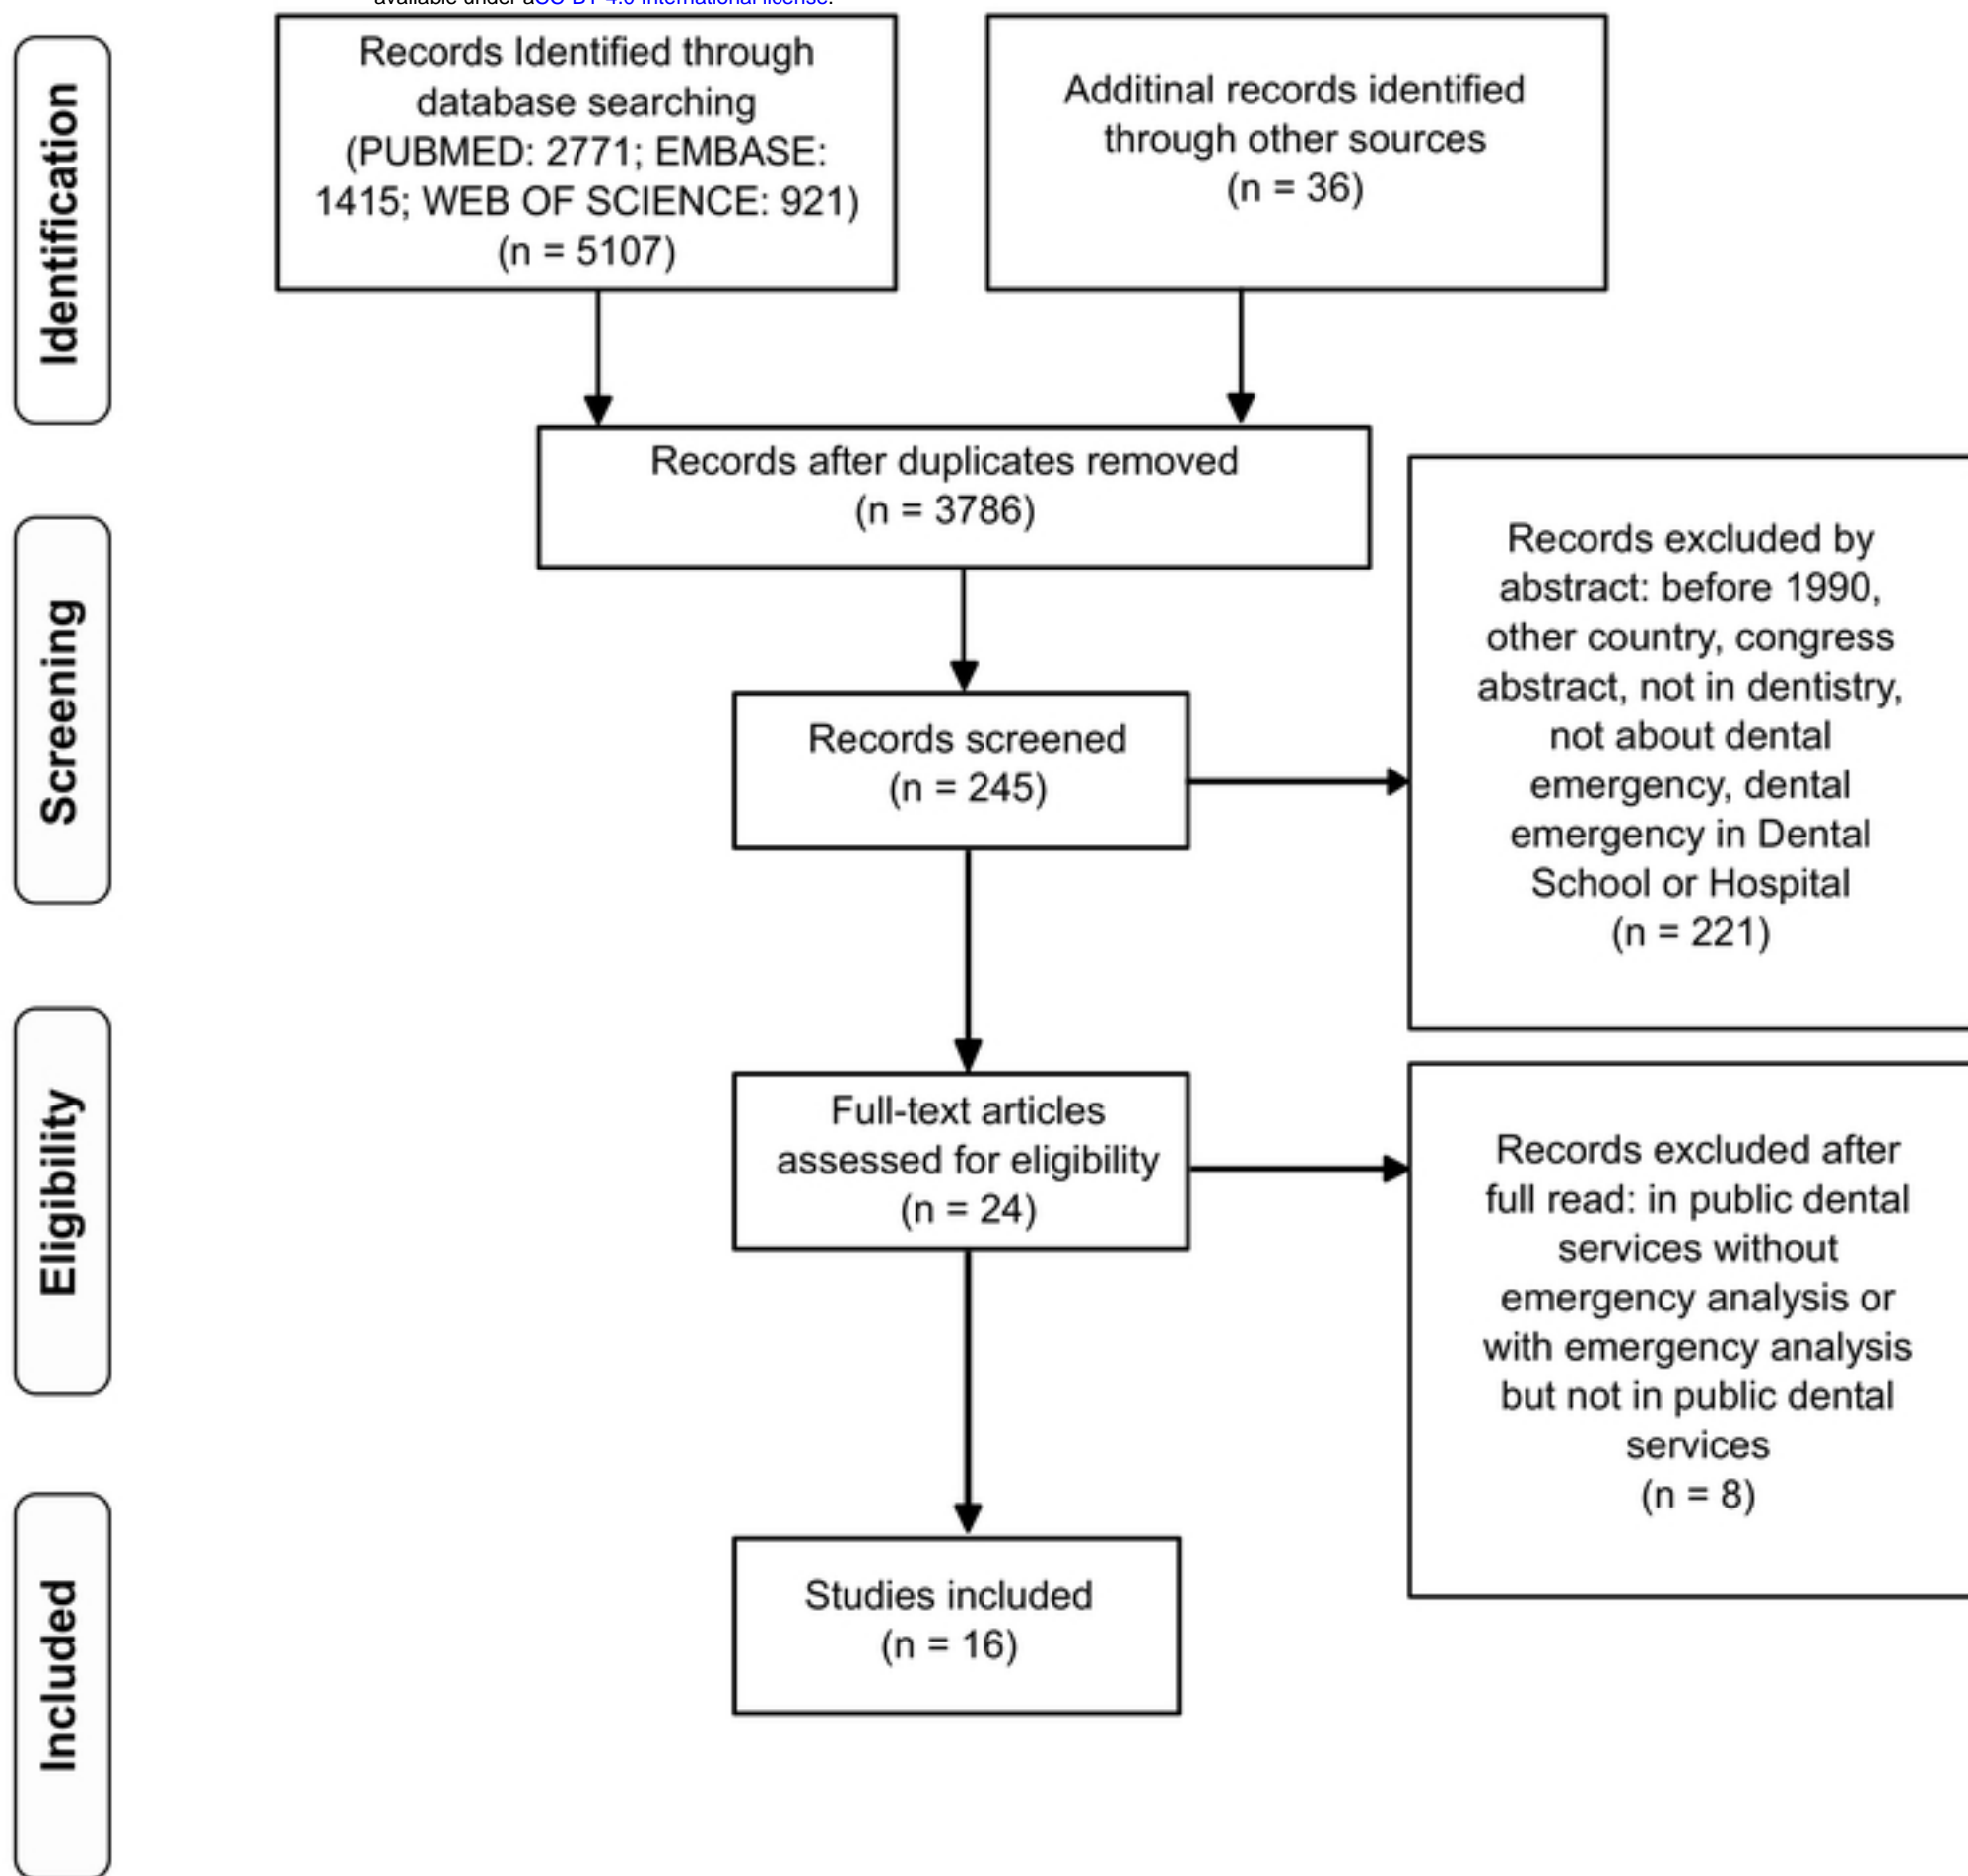

Figure

| <b>Predisposing (40)</b>                      | <b>Enabling (50)</b>                                                          | <b>Needs (14)</b>                        | <b>Health behaviors (39)</b>               | <b>Outcomes (3)</b>          |
|-----------------------------------------------|-------------------------------------------------------------------------------|------------------------------------------|--------------------------------------------|------------------------------|
| <b>Demographic</b>                            | <b>Health policy</b>                                                          | <b>Perceived</b>                         | <b>Personal health practices</b>           | <b>Consumer satisfaction</b> |
| Age (10) [16-25]                              | Knowledge about municipal policy and DEC re-organization strategy (2) [28,29] | Complaint (7) [16-18,20,22,24-25]        | Oral hygiene (2) [17]                      | Infrastructure (1) [24]      |
| Gender (10) [16-25]                           | Interface between PHC and DEC (5) [29]                                        | Perception of absence of need (1) [24]   | Self-medication (2) [16,25]                | Waiting time (1) [24]        |
| <b>Social</b>                                 | <b>Financing</b>                                                              | <b>Evaluated</b>                         | Alcohol consumption (1) [17]               | OHT (1) [24]                 |
| Occupation (2) [20,17]                        | Public resource management (1) [28]                                           | Risk rating (2) [16,25]                  | Smoking (2) [17,20]                        |                              |
| Education (3) [17,20,24]                      | Income (2) [20,24]                                                            | Diagnosis of oral disease (3) [17,20,26] | <b>Use of personal health services</b>     |                              |
| Maternal education (1) [20]                   | Health plan (1) [24]                                                          | No dental emergency need (1) [22]        | Due to dental emergency (14) [16,18,20-25] |                              |
| Marital status (2) [20,24]                    | Vehicle (1) [24]                                                              |                                          | Day or shift (4) [16,22,23,25]             |                              |
| Number of children (1) [20]                   | <b>Organization</b>                                                           |                                          | Month (2) [22,25]                          |                              |
| Index of vulnerability (1) [26]               | Expansion of the PHC (1) [27]                                                 |                                          | In elective care (1) [18]                  |                              |
| From urban/rural area (2) [16,25]             | Goal to dental emergency (1) [27]                                             |                                          | <b>Process of medical care</b>             |                              |
| From area of coverage by DEC or not (1) [22]  | Coverage by PHC (2) [26,27]                                                   |                                          | Treatment completed (2) [17,26]            |                              |
| From area of social exclusion or not (1) [23] | Coverage by OHT (2) [23,26]                                                   |                                          | Type of treatment (3) [18,19,23]           |                              |
| Ethnicity (1) [24]                            | DEC availability in administrative region (1) [21]                            |                                          | Problem-solving (3) [16,18,24]             |                              |
| <b>Predisposing conditions</b>                | Distance from PHC service and DEC (1) [21]                                    |                                          | Reference in the HCN (2) [16,26]           |                              |
| Fear (1) [20]                                 | Perspective of professionals about DEC (22) [28,30,31]                        |                                          |                                            |                              |
| Health conditions (4) [16,17,20,25]           | Perspective of managers about DEC (8) [28]                                    |                                          |                                            |                              |

bioRxiv preprint doi: <https://doi.org/10.1101/760504>; this version posted September 6, 2019. The copyright holder for this preprint (which was not certified by peer review) is the author/funder, who has granted bioRxiv a license to display the preprint in perpetuity. It is made available under aCC-BY 4.0 International license.

| <b>Predisposing</b>                                                               | <b>Enabling</b>                                                                                                   | <b>Needs</b>                                                                                | <b>Health Behaviors</b>             | <b>Outcomes</b>                                                                                   |
|-----------------------------------------------------------------------------------|-------------------------------------------------------------------------------------------------------------------|---------------------------------------------------------------------------------------------|-------------------------------------|---------------------------------------------------------------------------------------------------|
| Aspects related to violence and accidents and dental emergency.                   | NPEA impact on the access                                                                                         | Assessment according to subjective and social indicators of oral health                     | Adherence to the treatment protocol | User satisfaction                                                                                 |
| On oral health and dental care                                                    | Economic studies on health and access to emergency dental services                                                | Agreement between professionals and users                                                   | Ethics in dental emergency          | Impact of dental emergency on quality of life                                                     |
| Expectations about emergency care                                                 | Financial impact of a dental emergency for the user                                                               | Impact on the emergency need in populations with and without water fluoridation             |                                     | Impact of previous traumatic experience                                                           |
| Cultural values and norms of the population that access emergency dental services | Use of the service before and after organizational changes (adhesion to protocols, risk classification, training) | Agreement between professionals, managers and coordinators from different points of the RUE |                                     | Studies that relate the point of care and access to emergency through measures of quality of life |
| Changes in the stance of professionals in the organization of emergency care      | Use of services after changes in the ECN                                                                          |                                                                                             |                                     |                                                                                                   |
| Prevention and management of dental trauma                                        |                                                                                                                   |                                                                                             |                                     |                                                                                                   |
| User knowledge on the service<br>Disabled people                                  |                                                                                                                   |                                                                                             |                                     |                                                                                                   |
| Anxiety                                                                           |                                                                                                                   |                                                                                             |                                     |                                                                                                   |

Figure
